# Supplementary material for: Reversible luminescence “off–on” regulation based on tunable photodimerization via crystal-to-cocrystal transformation
Source: Royal Society of Chemistry journal article supplement (doi:10.1039/d1tc04401j), 2021-11-29
Supplement: d1tc04401j1.pdf [file d1tc04401j1.pdf]

## Electronic Supporting Information

### **Reversible Luminescent "Off-On" Regulation Based on Tunable Photodimerization via Crystal-to-Cocrystal Transformation**

Yufei Wang,<sup>ab</sup> Hongxing Shang,<sup>ab</sup> Bao Li<sup>b</sup> and Shimei Jiang<sup>\*ab</sup>

<sup>a</sup>Engineering Research Center of Organic and Polymer Optoelectronic Materials,  
Ministry of Education, College of Chemistry, Jilin University, 2699 Qianjin Street,  
Changchun 130012, P. R. China

<sup>b</sup>State Key Laboratory of Supramolecular Structure and Materials, College of  
Chemistry, Jilin University, 2699 Qianjin Street, Changchun 130012, P. R. China

E-mail: [smjiang@jlu.edu.cn](mailto:smjiang@jlu.edu.cn)

# Contents

1. Synthesis and characterization of compounds.....S2
2. Photophysical properties and crystal data.....S9
3. Photodimerization reaction.....S12
4. Characterization of cocrystals.....S16

## 1. Synthesis and characterization of compounds

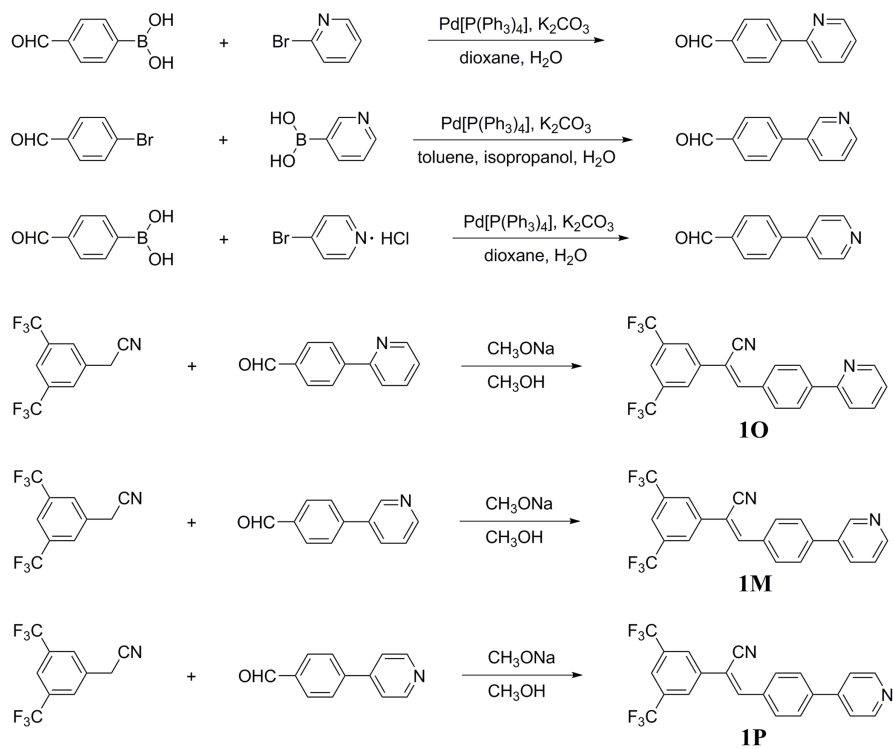

Scheme S1 Synthetic routes of 1O, 1M and 1P.

### Synthesis of 4-(pyridin-2-yl)benzaldehyde

(4-formylphenyl)boronic acid (1.74 g, 11.6 mmol) and  $K_2CO_3$  (4.26 g, 30.8 mmol) were dispersed in the mixture solvent of 60.0 mL of 1,4-dioxane and 15.0 mL of water. The solution was stirred at room temperature and bubbled with nitrogen for 30 min. Then 2-bromopyridine (735  $\mu$ L, 1.22 g, 7.71 mmol) and  $Pd(PPh_3)_4$  (0.45 g, 0.39 mmol) were added. The mixture was heated to reflux. After 9 hours, the reaction mixture was cooled to room temperature and solvent was removed on a rotary evaporator. The residue was poured into saturated salt water and extracted with ethyl acetate. The organic layer was dried over  $MgSO_4$ . After filtration and solvent evaporation, the crude product was purified by silica-gel chromatography using ethyl acetate/hexane mixture (1:2, v/v) as eluent to obtain 4-(pyridin-2-yl)benzaldehyde (1.20 g, yield 81%).

$^1H$ -NMR (500 MHz,  $CDCl_3$ )  $\delta$ /ppm = 10.09 (s, 1H), 8.75 (d,  $J$  = 4.7 Hz, 1H), 8.18 (d,  $J$  = 8.1 Hz, 2H), 8.00 (d,  $J$  = 8.1 Hz, 2H), 7.82 (d,  $J$  = 3.7 Hz, 2H), 7.38-7.28 (m, 1H).

### Synthesis of 4-(pyridin-3-yl)benzaldehyde

4-bromobenzaldehyde (1.50 g, 8.10 mmol), pyridin-3-ylboronic acid (1.20 g, 9.76 mmol) and  $K_2CO_3$  (4.26 g, 30.8 mmol) were dispersed in the mixture solvent of 40.0 mL of toluene, 15.0 mL of isopropanol and 15.0 mL of water. The solution was stirred at room temperature and bubbled with nitrogen for 30 min. Then  $Pd(PPh_3)_4$  (0.45 g, 0.39 mmol) was added. The mixture was heated to reflux. After 9 hours, the reaction mixture was cooled to room temperature and solvent was removed on a rotary evaporator. The residue was poured into saturated salt water and extracted with ethyl acetate. The organic layer was dried over  $MgSO_4$ . After filtration and solvent evaporation, the crude product was purified by silica-gel chromatography using  $CH_2Cl_2$ /hexane mixture (2:1, v/v) as eluent to obtain 4-(pyridin-3-yl)benzaldehyde (0.83 g, yield 56%).

$^1H$ -NMR (500 MHz,  $CDCl_3$ )  $\delta$ /ppm = 10.09 (s, 1H), 8.91 (d,  $J$  = 1.7 Hz, 1H), 8.67 (d,  $J$  = 4.5 Hz, 1H), 8.01 (d,  $J$  = 8.1 Hz, 2H), 7.94 (d,  $J$  = 7.9 Hz, 1H), 7.77 (d,  $J$  = 8.1 Hz, 2H), 7.43 (dd,  $J$  = 7.8, 4.8 Hz, 1H).

### Synthesis of 4-(pyridin-4-yl)benzaldehyde

(4-formylphenyl)boronic acid (1.50 g, 7.71 mmol), 4-bromopyridine hydrochloride (1.74 g, 11.6 mmol) and  $K_2CO_3$  (4.26 g, 30.8 mmol) were dispersed in the mixture solvent of 60.0 mL of 1,4-dioxane and 15.0 mL of water. The solution was stirred at room temperature and bubbled with nitrogen for 30 min. Then  $Pd(PPh_3)_4$  (0.45 g, 0.39 mmol) was added. The mixture was heated to reflux. After 9 hours, the reaction mixture was cooled to room temperature and solvent was removed on a rotary evaporator. The residue was poured into saturated salt water and extracted with  $CH_2Cl_2$ . The organic layer was dried over  $MgSO_4$ . After filtration and solvent evaporation, the crude product was purified by silica-gel chromatography using ethyl acetate/hexane mixture (2:1, v/v) as eluent to obtain 4-(pyridin-4-yl)benzaldehyde (1.36 g, yield 92%).

$^1H$ -NMR (500 MHz,  $CDCl_3$ )  $\delta/ppm$  = 10.10 (s, 1H), 8.73 (dd,  $J$  = 4.6, 1.5 Hz, 2H), 8.01 (d,  $J$  = 8.2 Hz, 2H), 7.81 (d,  $J$  = 8.2 Hz, 2H), 7.55 (dd,  $J$  = 4.6, 1.5 Hz, 2H).

### Synthesis of 1O

#### (Z)-2-(3,5-bis(trifluoromethyl)phenyl)-3-(4-(pyridin-2-yl)-phenyl)acrylonitrile

2-(3,5-bis(trifluoromethyl)phenyl)acetonitrile (0.55 mL, 0.76 g, 3.0 mmol) and 4-(pyridin-2-yl)benzaldehyde (0.55 g, 3.0 mmol) were dissolved in 15.0 mL of 20 mM  $CH_3ONa/CH_3OH$ . The mixture was stirred at room temperature for two days. After that, the precipitate was filtered and washed several times with methanol and water, respectively. The product was obtained (1.03 g, yield 82%).

$^1H$ -NMR (500 MHz,  $CDCl_3$ )  $\delta/ppm$  = 8.75 (d,  $J$  = 4.7 Hz, 1H), 8.18 (d,  $J$  = 8.3 Hz, 2H), 8.13 (s, 2H), 8.08 (d,  $J$  = 8.4 Hz, 2H), 7.92 (s, 1H), 7.83 (d,  $J$  = 3.8 Hz, 2H), 7.71 (s, 1H), 7.32 (q,  $J$  = 4.7 Hz, 1H).  $^{13}C$ -NMR (126 MHz,  $CDCl_3$ )  $\delta/ppm$  = 155.89, 150.06, 144.92, 142.40, 137.16, 136.92, 133.20, 132.88 (q,  $J$  = 33.80 Hz), 130.36, 127.68, 126.15, 123.12, 123.09 (q,  $J$  = 273.58 Hz), 122.83, 120.99, 117.14 and 109.07. Anal. Calc. for  $C_{22}H_{12}F_6N_2$ : C, 63.16; H, 2.89; N, 6.70. Found: C, 63.73; H, 2.74; N, 6.66. MS:  $m/z$  = 418.36.

## Synthesis of 1M

### **(Z)-2-(3,5-bis(trifluoromethyl)phenyl)-3-(4-(pyridin-3-yl)-phenyl)acrylonitrile**

2-(3,5-bis(trifluoromethyl)phenyl)acetonitrile (0.55 mL, 0.76 g, 3.0 mmol) and 4-(pyridin-3-yl)benzaldehyde (0.55 g, 3.0 mmol) were dissolved in 15.0 mL of 20 mM CH<sub>3</sub>ONa/CH<sub>3</sub>OH. The mixture was stirred at room temperature for two days. After that, the precipitate was filtered and washed several times with methanol and water, respectively. The product was obtained (1.13 g, yield 90%).

<sup>1</sup>H-NMR (500 MHz, CDCl<sub>3</sub>) δ/ppm = 8.91 (d, *J* = 1.8 Hz, 1H), 8.65 (dd, *J* = 4.8, 1.6 Hz, 1H), 8.12 (s, 2H), 8.07 (d, *J* = 8.3 Hz, 2H), 7.98-7.93 (m, 1H), 7.92 (s, 1H), 7.74 (d, *J* = 8.4 Hz, 2H), 7.71 (s, 1H), 7.45-7.36 (m, 1H). <sup>13</sup>C-NMR (126 MHz, CDCl<sub>3</sub>) δ/ppm = 149.47, 148.33, 144.61, 141.08, 136.77, 135.33, 134.51, 132.92 (q, *J* = 33.86 Hz), 132.55, 130.60, 127.90, 126.16, 123.89, 123.06 (q, *J* = 273.52 Hz), 122.93, 117.08 and 109.36. Anal. Calc. for C<sub>22</sub>H<sub>12</sub>F<sub>6</sub>N<sub>2</sub>: C, 63.16; H, 2.89; N, 6.70. Found: C, 63.98; H, 2.66; N, 6.74. MS: *m/z* = 418.36.

## Synthesis of 1P

### **(Z)-2-(3,5-bis(trifluoromethyl)phenyl)-3-(4-(pyridin-4-yl)-phenyl)acrylonitrile**

2-(3,5-bis(trifluoromethyl)phenyl)acetonitrile (0.55 mL, 0.76 g, 3.0 mmol) and 4-(pyridin-4-yl)benzaldehyde (0.55 g, 3.0 mmol) were dissolved in 15.0 mL of 20 mM CH<sub>3</sub>ONa/CH<sub>3</sub>OH. The mixture was stirred at room temperature for two days. After that, the precipitate was filtered and washed several times with methanol and water, respectively. The product was obtained (1.07 g, yield 85%).

<sup>1</sup>H-NMR (500 MHz, CDCl<sub>3</sub>) δ/ppm = 8.72 (d, *J* = 5.6 Hz, 2H), 8.12 (s, 2H), 8.08 (d, *J* = 8.2 Hz, 2H), 7.92 (s, 1H), 7.79 (d, *J* = 8.3 Hz, 2H), 7.71 (s, 1H), 7.56 (d, *J* = 5.7 Hz, 2H). <sup>13</sup>C-NMR (126 MHz, CDCl<sub>3</sub>) δ/ppm = 150.56, 147.00, 144.41, 141.22, 136.67, 133.45, 132.96 (q, *J* = 33.97 Hz), 130.58, 127.89, 126.22, 123.05, 123.05 (q, *J* = 273.46 Hz), 121.64, 116.98 and 109.86. Anal. Calc. for C<sub>22</sub>H<sub>12</sub>F<sub>6</sub>N<sub>2</sub>: C, 63.16; H, 2.89; N, 6.70. Found: C, 63.76; H, 2.96; N, 6.67. MS: *m/z* = 418.34.

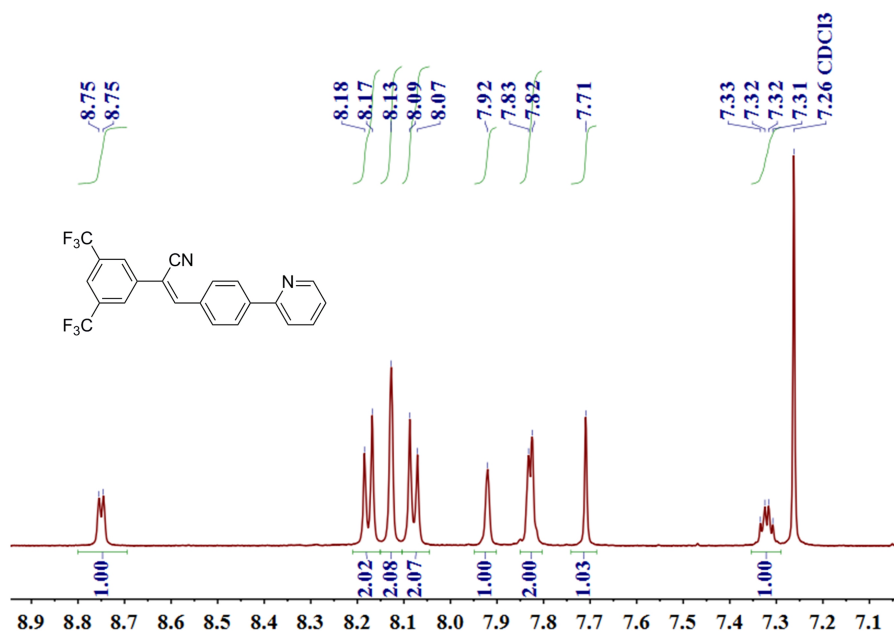

Fig. S1  $^1\text{H-NMR}$  spectrum of 1O (14 mM) in  $\text{CDCl}_3$ .

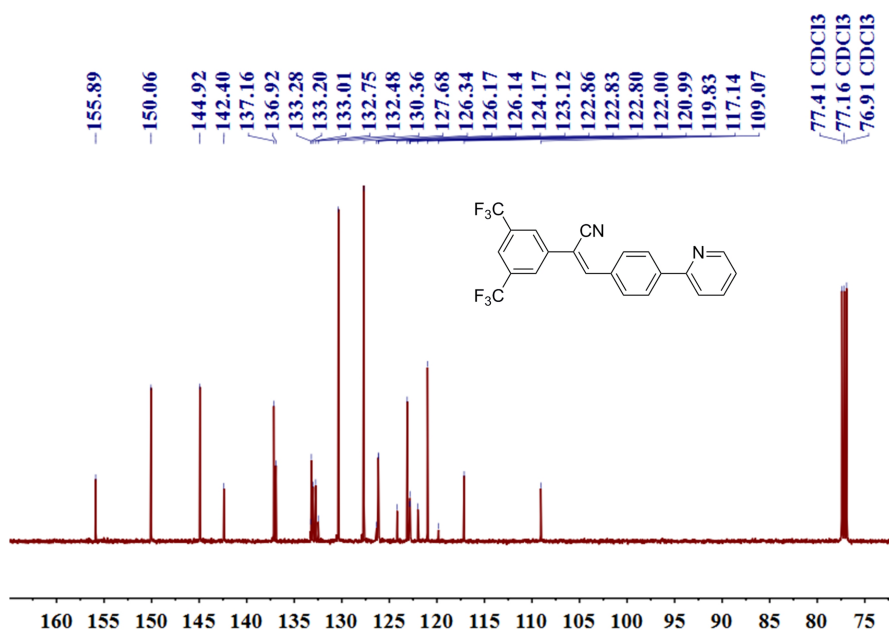

Fig. S2  $^{13}\text{C-NMR}$  spectrum of 1O (98 mM) in  $\text{CDCl}_3$ .

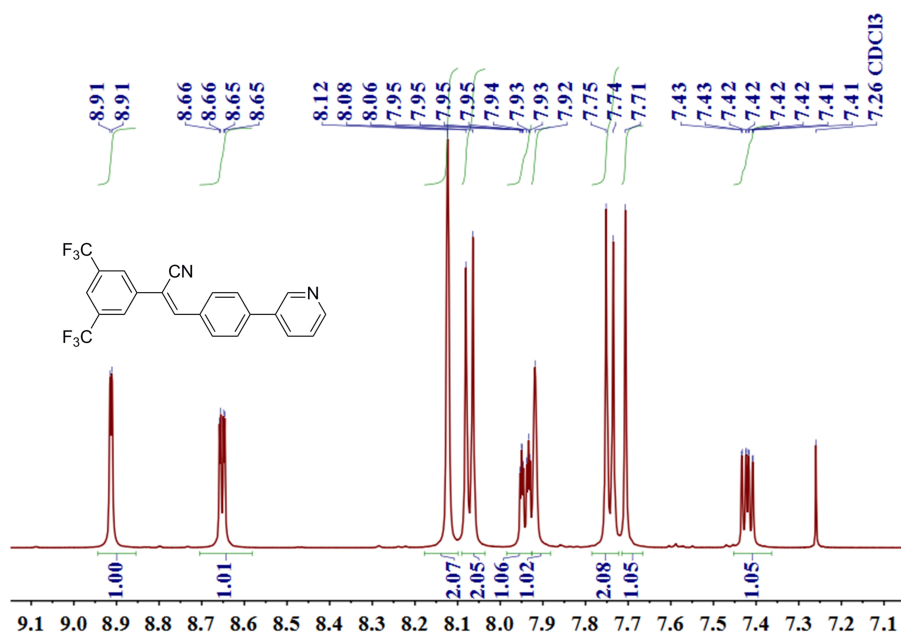

Fig. S3 <sup>1</sup>H-NMR spectrum of 1M (98 mM) in CDCl<sub>3</sub>.

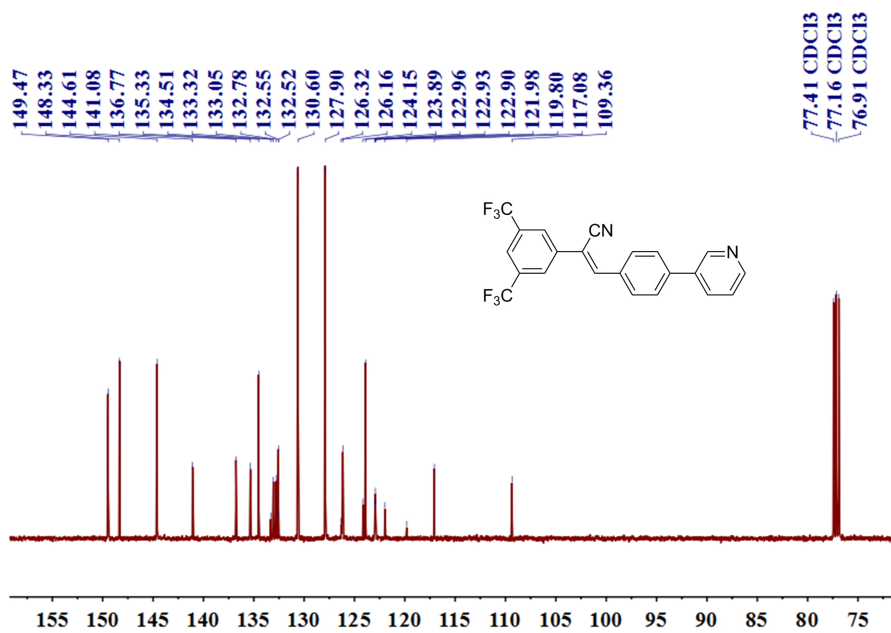

Fig. S4 <sup>13</sup>C-NMR spectrum of 1M (98 mM) in CDCl<sub>3</sub>.

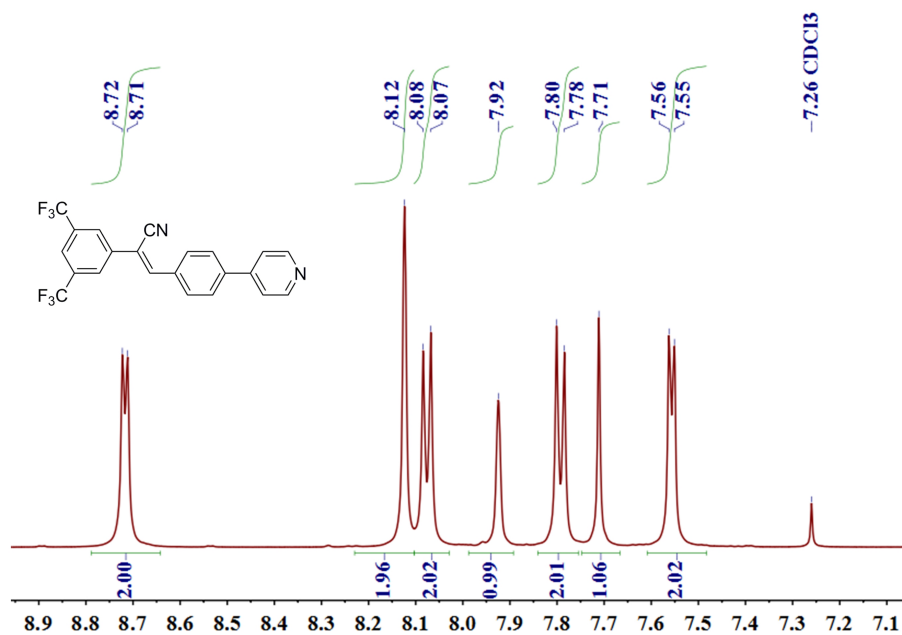

Fig. S5 <sup>1</sup>H-NMR spectrum of 1P (98 mM) in CDCl<sub>3</sub>.

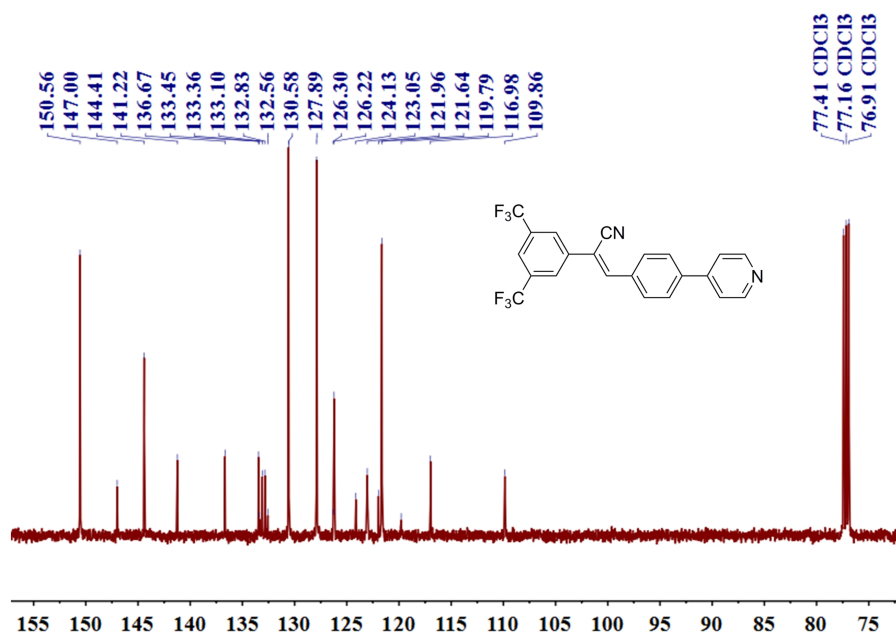

Fig. S6 <sup>13</sup>C-NMR spectrum of 1P (98 mM) in CDCl<sub>3</sub>.

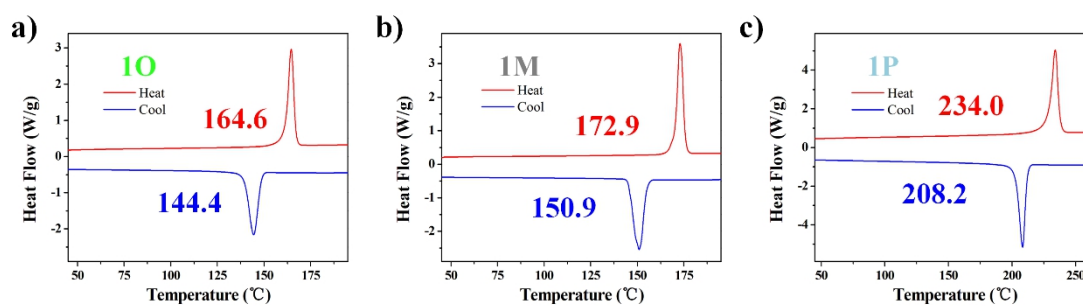

Fig. S7 DSC traces of (a) 1O, (b) 1M and (c) 1P (20 °C min<sup>-1</sup> on the second cycle).



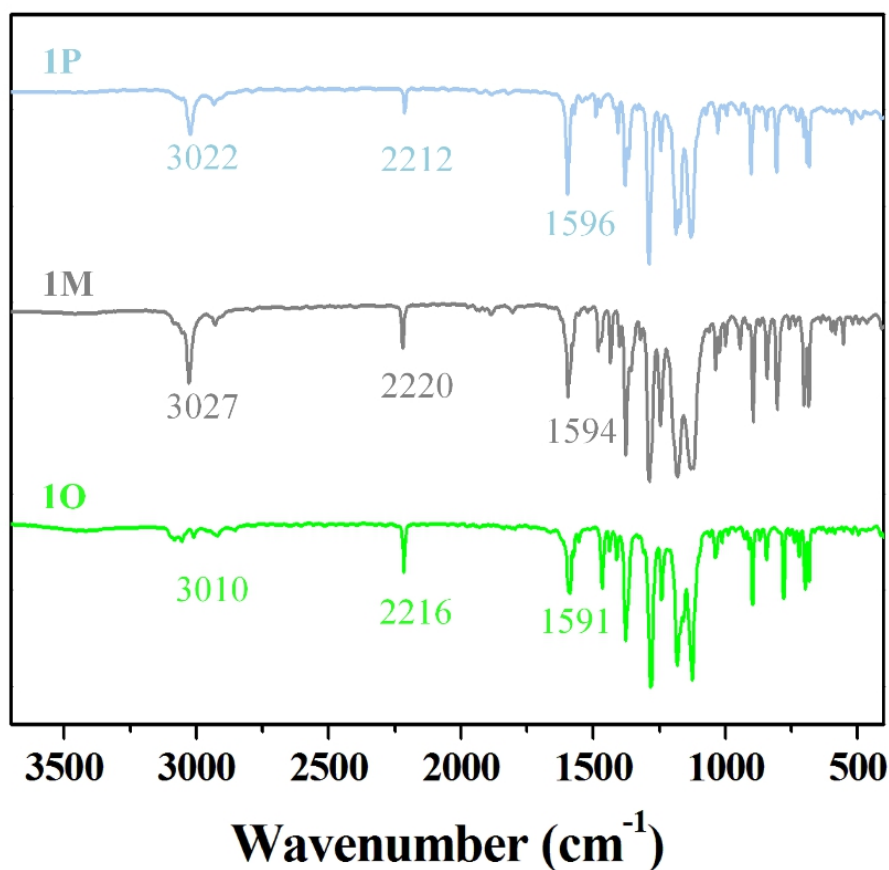

Fig. S8 FT-IR spectra of 1O, 1M and 1P.

## 2. Photophysical properties and crystal data

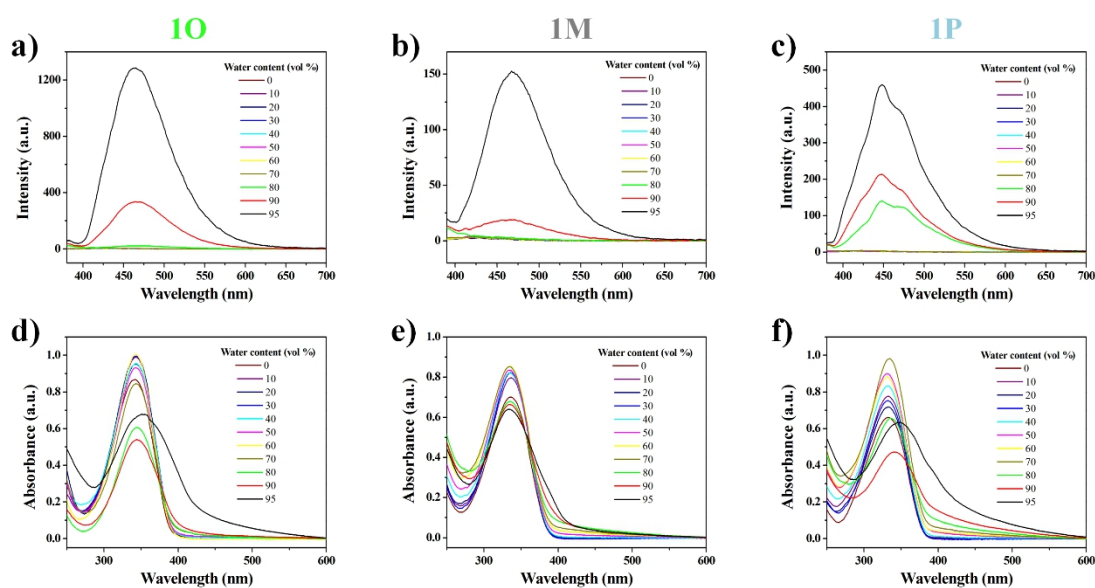

Fig. S9 PL spectra of (a) 1O, (b) 1M and (c) 1P in THF/H<sub>2</sub>O mixtures with different water content ( $\lambda_{ex}$  = 370 nm). Accordingly, UV-vis spectra of (d) 1O, (e) 1M and (f) 1P in THF/H<sub>2</sub>O mixtures with different water content (20  $\mu$ M).

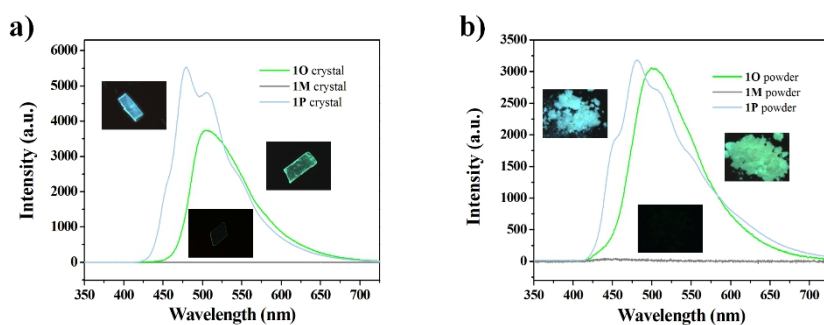

**Fig. S10** PL spectra of (a) crystals and (b) powders for 1O, 1M and 1P. The insets show the fluorescent microphotographs of crystals and powders, respectively ( $\lambda_{\text{ex}} = 365$  nm).

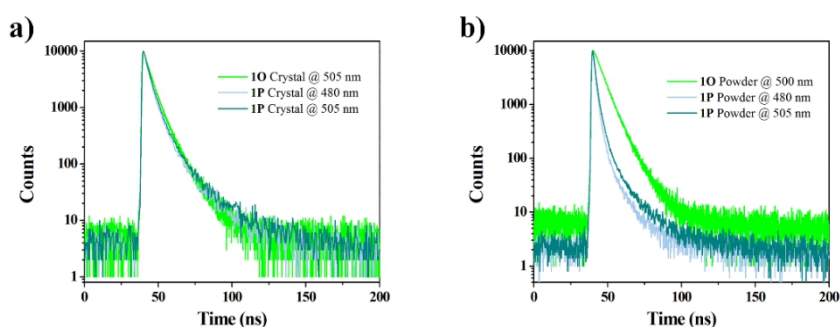

**Fig. S11** The lifetimes of 1O and 1P in (a) the crystal states and (b) the powder states ( $\lambda_{\text{ex}} = 365$  nm).

**Table S1** The photophysical properties of 1O and 1P

| Compound  | state   | PL (nm) | $\tau$ (ns)                                       | PLQY | $k_r$ ( $\text{s}^{-1}$ ) <sup>a</sup> | $k_{\text{nr}}$ ( $\text{s}^{-1}$ ) <sup>b</sup> |
|-----------|---------|---------|---------------------------------------------------|------|----------------------------------------|--------------------------------------------------|
| <b>1O</b> | powder  | 500     | 6.365                                             | 0.36 | $5.686 \times 10^7$                    | $1.003 \times 10^8$                              |
|           | crystal | 505     | $\tau_1 = 4.93$ (0.82)<br>$\tau_2 = 12.70$ (0.18) | 0.29 | $4.509 \times 10^7$                    | $1.129 \times 10^8$                              |
| <b>1P</b> | powder  | 480     | $\tau_1 = 1.60$ (0.85)<br>$\tau_2 = 7.24$ (0.15)  | 0.42 | $1.700 \times 10^8$                    | $2.390 \times 10^8$                              |
|           |         | 505     | $\tau_1 = 1.91$ (0.83)<br>$\tau_2 = 8.83$ (0.17)  |      | $1.349 \times 10^8$                    | $1.896 \times 10^8$                              |
|           | crystal | 480     | $\tau_1 = 3.67$ (0.75)<br>$\tau_2 = 12.73$ (0.25) | 0.38 | $6.427 \times 10^7$                    | $1.043 \times 10^8$                              |
|           |         | 505     | $\tau_1 = 4.22$ (0.80)<br>$\tau_2 = 15.59$ (0.20) |      | $5.871 \times 10^7$                    | $9.531 \times 10^7$                              |

<sup>a</sup>Radiative transition rate constant:  $k_r = \Phi_F / \langle \tau \rangle$ .

<sup>b</sup>Non-radiative transition rate constant:  $k_{\text{nr}} = (1 - \Phi_F) / \langle \tau \rangle$ .  $\langle \tau \rangle = (A_1 \tau_1^2 + A_2 \tau_2^2) / (A_1 \tau_1 + A_2 \tau_2)$ .

**Table S2** Crystal data and structure refinements for 1O, 1M and 1P

| Compound                                                     | 1O                                                                      | 1M                                                                      | 1P                                                                     |
|--------------------------------------------------------------|-------------------------------------------------------------------------|-------------------------------------------------------------------------|------------------------------------------------------------------------|
| Empirical formula                                            | C <sub>22</sub> H <sub>12</sub> F <sub>6</sub> N <sub>2</sub>           | C <sub>22</sub> H <sub>12</sub> F <sub>6</sub> N <sub>2</sub>           | C <sub>22</sub> H <sub>12</sub> F <sub>6</sub> N <sub>2</sub>          |
| Formula weight/g mol <sup>-1</sup>                           | 418.34                                                                  | 418.34                                                                  | 418.34                                                                 |
| <i>T</i> /K                                                  | 293(2)                                                                  | 293(2)                                                                  | 293(2)                                                                 |
| $\lambda$ /Å                                                 | 0.71073                                                                 | 0.71073                                                                 | 0.71073                                                                |
| Crystal system                                               | Monoclinic                                                              | Monoclinic                                                              | Triclinic                                                              |
| Space group                                                  | <i>P</i> 2/ <i>c</i>                                                    | <i>C</i> 2/ <i>c</i>                                                    | <i>P</i> -1                                                            |
| Unit cell dimensions/Å                                       | <i>a</i> = 15.858(2)<br><i>b</i> = 8.8033(12)<br><i>c</i> = 13.6717(18) | <i>a</i> = 27.4290(13)<br><i>b</i> = 9.1587(4)<br><i>c</i> = 15.1392(6) | <i>a</i> = 8.7740(18)<br><i>b</i> = 9.0110(18)<br><i>c</i> = 11.624(2) |
| Unit cell angles/°                                           | $\alpha$ = 90<br>$\beta$ = 95.506(6)<br>$\gamma$ = 90                   | $\alpha$ = 90<br>$\beta$ = 98.565(3)<br>$\gamma$ = 90                   | $\alpha$ = 85.74(3)<br>$\beta$ = 88.18(3)<br>$\gamma$ = 86.44(3)       |
| Volume/Å <sup>3</sup>                                        | 1899.8(4)                                                               | 3760.8(3)                                                               | 914.4(3)                                                               |
| <i>Z</i>                                                     | 4                                                                       | 8                                                                       | 2                                                                      |
| $\rho$ (calculated)/Mg m <sup>-3</sup>                       | 1.463                                                                   | 1.478                                                                   | 1.519                                                                  |
| Absorption coefficient/mm <sup>-1</sup>                      | 0.128                                                                   | 0.129                                                                   | 0.133                                                                  |
| <i>F</i> (000)                                               | 848                                                                     | 1696                                                                    | 424                                                                    |
| Crystal size/mm <sup>3</sup>                                 | 0.140 × 0.120 × 0.100                                                   | 0.130 × 0.120 × 0.100                                                   | 0.13 × 0.12 × 0.10                                                     |
| $\theta$ range for data collection/°                         | 2.982 to 27.558                                                         | 2.656 to 28.308                                                         | 3.15 to 27.48                                                          |
| Index ranges                                                 | -20 ≤ <i>h</i> ≤ 18,<br>-11 ≤ <i>k</i> ≤ 11,<br>-17 ≤ <i>l</i> ≤ 16     | -36 ≤ <i>h</i> ≤ 36,<br>-12 ≤ <i>k</i> ≤ 12,<br>-20 ≤ <i>l</i> ≤ 20     | -11 ≤ <i>h</i> ≤ 11,<br>-11 ≤ <i>k</i> ≤ 10,<br>-15 ≤ <i>l</i> ≤ 14    |
| Reflections collected                                        | 17810                                                                   | 37714                                                                   | 8950                                                                   |
| Independent reflections                                      | 4109 [ <i>R</i> (int) = 0.0471]                                         | 4669 [ <i>R</i> (int) = 0.0360]                                         | 4156 [ <i>R</i> (int) = 0.0446]                                        |
| Completeness to $\theta$ = 27.48                             | 96.1 %                                                                  | 99.9 %                                                                  | 98.7 %                                                                 |
| Absorption correction                                        | Semi-empirical from equivalents                                         | Semi-empirical from equivalents                                         | Semi-empirical from equivalents                                        |
| Max. and min. transmission                                   | 0.987 and 0.982                                                         | 0.987 and 0.983                                                         | 0.9868 and 0.9829                                                      |
| Refinement method                                            | Full-matrix least-squares on <i>F</i> <sup>2</sup>                      | Full-matrix least-squares on <i>F</i> <sup>2</sup>                      | Full-matrix least-squares on <i>F</i> <sup>2</sup>                     |
| Data / restraints / parameters                               | 4109 / 6 / 352                                                          | 4669 / 0 / 327                                                          | 4156 / 72 / 327                                                        |
| Goodness-of-fit on <i>F</i> <sup>2</sup>                     | 1.083                                                                   | 1.047                                                                   | 0.980                                                                  |
| Final <i>R</i> indices [ <i>I</i> > 2 $\sigma$ ( <i>I</i> )] | <i>R</i> <sub>1</sub> = 0.0860, w <i>R</i> <sub>2</sub> = 0.2328        | <i>R</i> <sub>1</sub> = 0.0616, w <i>R</i> <sub>2</sub> = 0.1597        | <i>R</i> <sub>1</sub> = 0.0624, w <i>R</i> <sub>2</sub> = 0.1827       |
| <i>R</i> indices (all data)                                  | <i>R</i> <sub>1</sub> = 0.1263, w <i>R</i> <sub>2</sub> = 0.2626        | <i>R</i> <sub>1</sub> = 0.0805, w <i>R</i> <sub>2</sub> = 0.1751        | <i>R</i> <sub>1</sub> = 0.1119, w <i>R</i> <sub>2</sub> = 0.2277       |
| Largest diff. peak and hole/e Å <sup>-3</sup>                | 0.330 and -0.211                                                        | 0.267 and -0.197                                                        | 0.412 and -0.327                                                       |
| CCDC                                                         | 1863051                                                                 | 1863052                                                                 | 1863053                                                                |

### 3. Photodimerization reaction

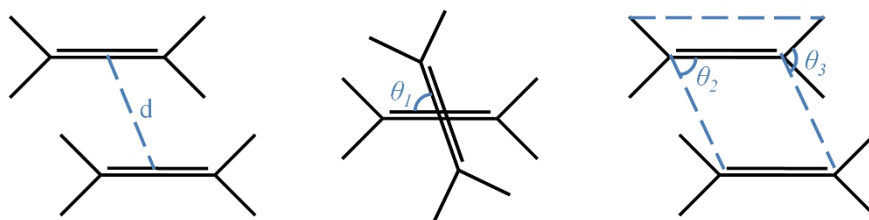

Fig. S12 The parameters are usually considered to be geometric criteria for [2+2] cycloaddition.

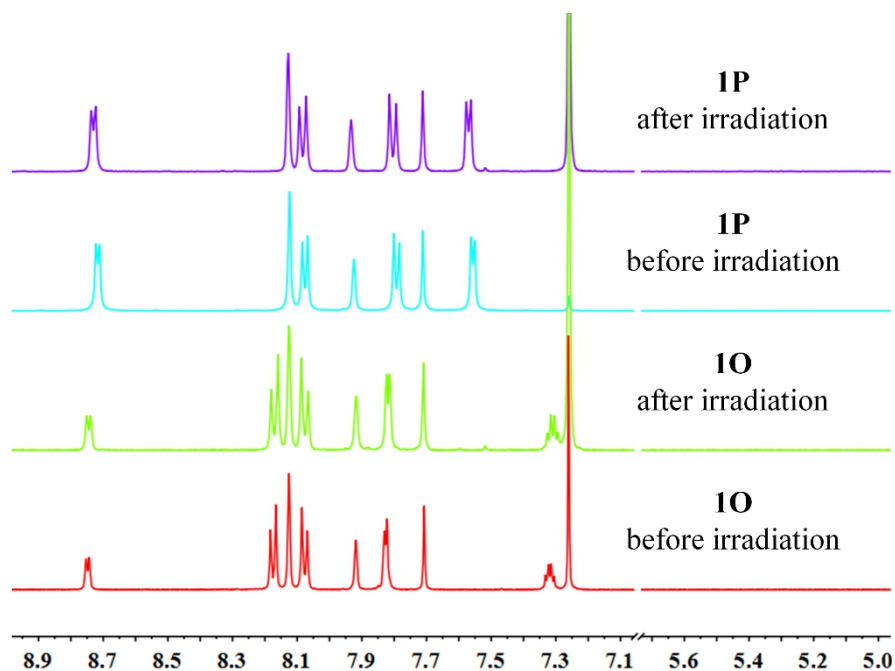

Fig. S13  $^1\text{H-NMR}$  spectra of 1O and 1P crystals (14 mM) before and after irradiation.

#### Synthesis of photodimerization product *c*-1M

The powder of 1M (0.30 g, 0.72 mmol) in the nuclear magnetic tubes was irradiated with 365 nm UV light from a 20 W LED lamp for 30 min. The crude product was purified by silica-gel chromatography using ethyl acetate/ $\text{CH}_2\text{Cl}_2$  mixture (1:10, v/v) as eluent to obtain *c*-1M (0.20 g, yield 67%).

$^1\text{H-NMR}$  (500 MHz,  $\text{CDCl}_3$ )  $\delta/\text{ppm}$  = 8.80 (s, 2H), 8.64 (d,  $J$  = 3.9 Hz, 2H), 7.85 (s, 2H), 7.82 (d,  $J$  = 7.9 Hz, 2H), 7.71 (s, 4H), 7.59 (d,  $J$  = 8.1 Hz, 4H), 7.45 (d,  $J$  = 8.1 Hz, 4H), 7.39 (dd,  $J$  = 7.6, 4.9 Hz, 2H), 5.39 (s, 2H).  $^{13}\text{C-NMR}$  (126 MHz,  $\text{CDCl}_3$ )  $\delta/\text{ppm}$  = 149.43, 148.33, 140.07, 136.94, 135.23, 134.52, 132.73 (q,  $J$  = 34.17 Hz), 130.76, 130.23, 128.37, 128.26, 123.83, 123.26, 122.63 (q,  $J$  = 273.83 Hz), 119.91, 55.64 and 47.34.

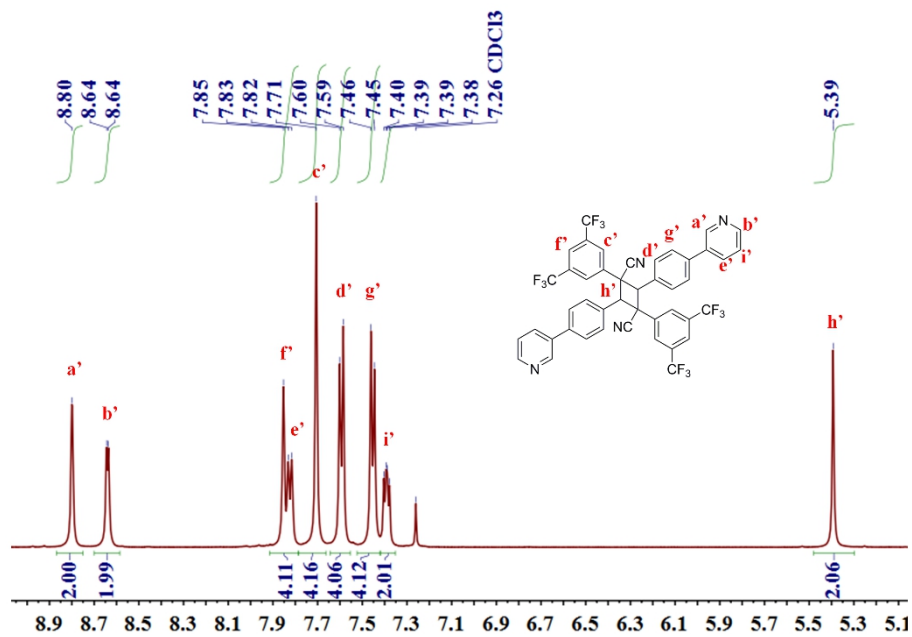

Fig. S14 <sup>1</sup>H-NMR spectrum of *c*-1M (98 mM) in CDCl<sub>3</sub>.

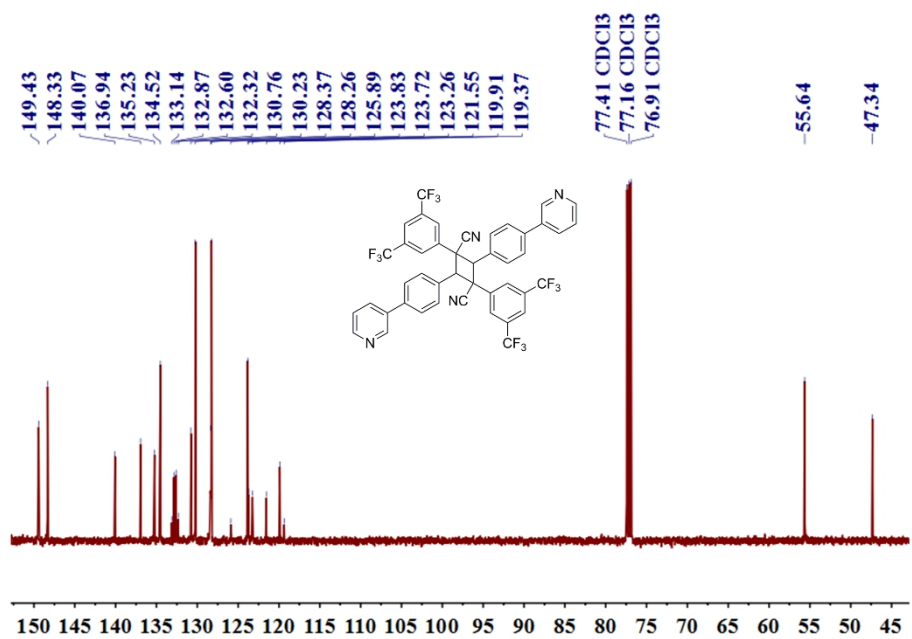

Fig. S15 <sup>13</sup>C-NMR spectrum of *c*-1M (98 mM) in CDCl<sub>3</sub>.

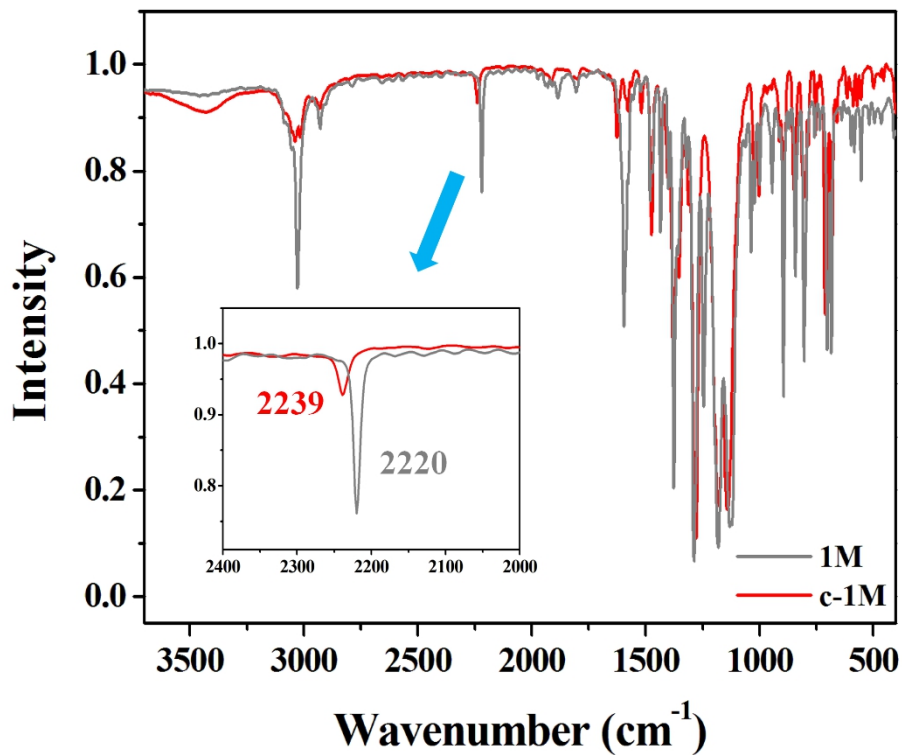

Fig. S16 FT-IR spectra of 1M and *c*-1M. Insert: amplifying curves of cyano stretching peaks.

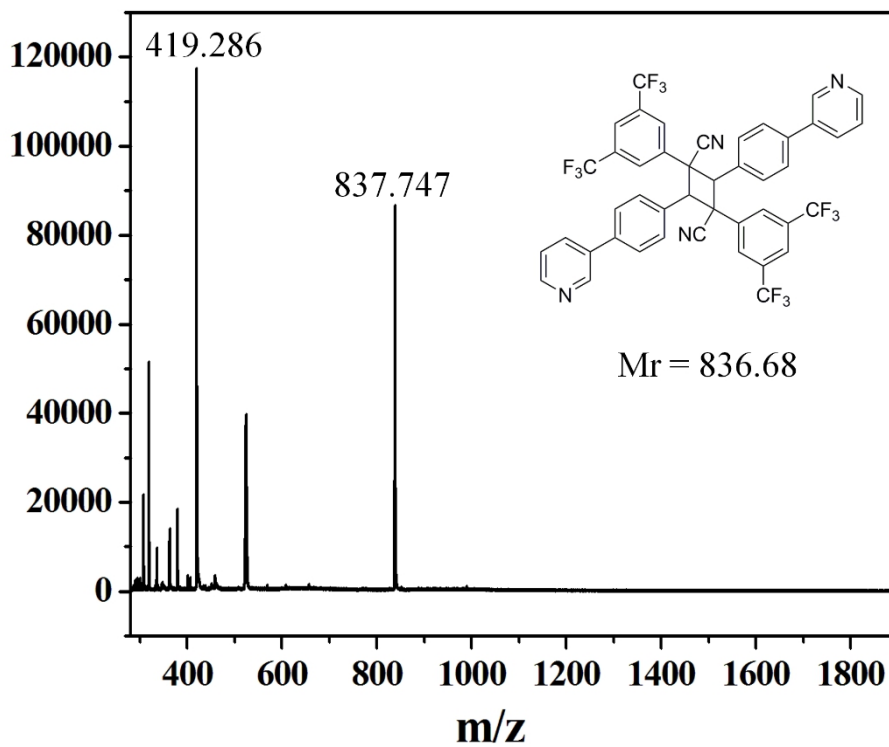

Fig. S17 MALDI-TOF mass spectrum of *c*-1M.

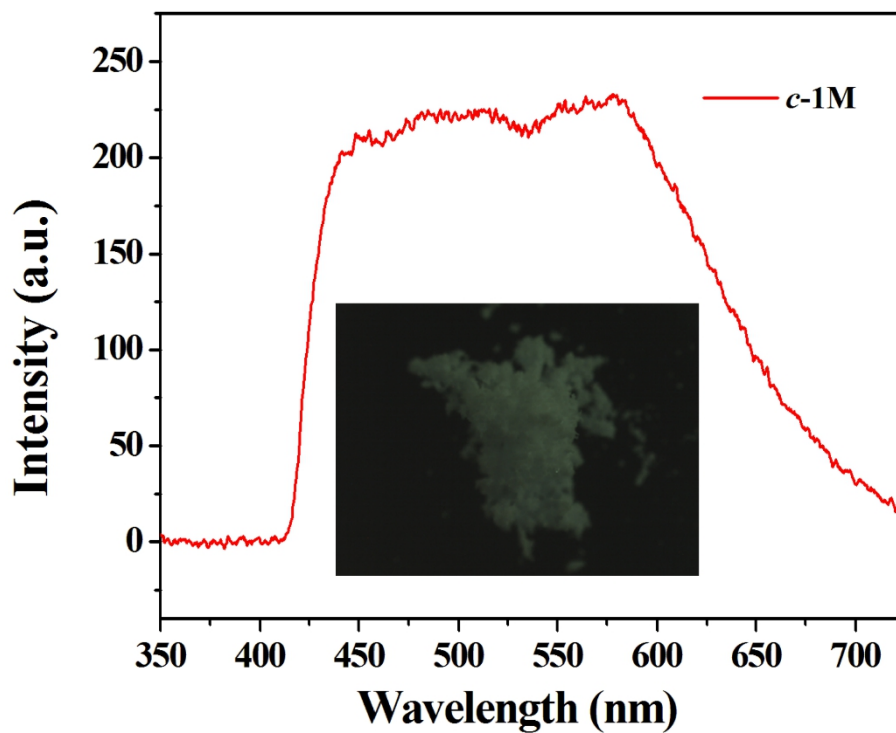

Fig. S18 PL spectrum of *c*-1M powder and inset is fluorescence microscopy image of pure *c*-1M ( $\lambda_{\text{ex}} = 365$  nm).

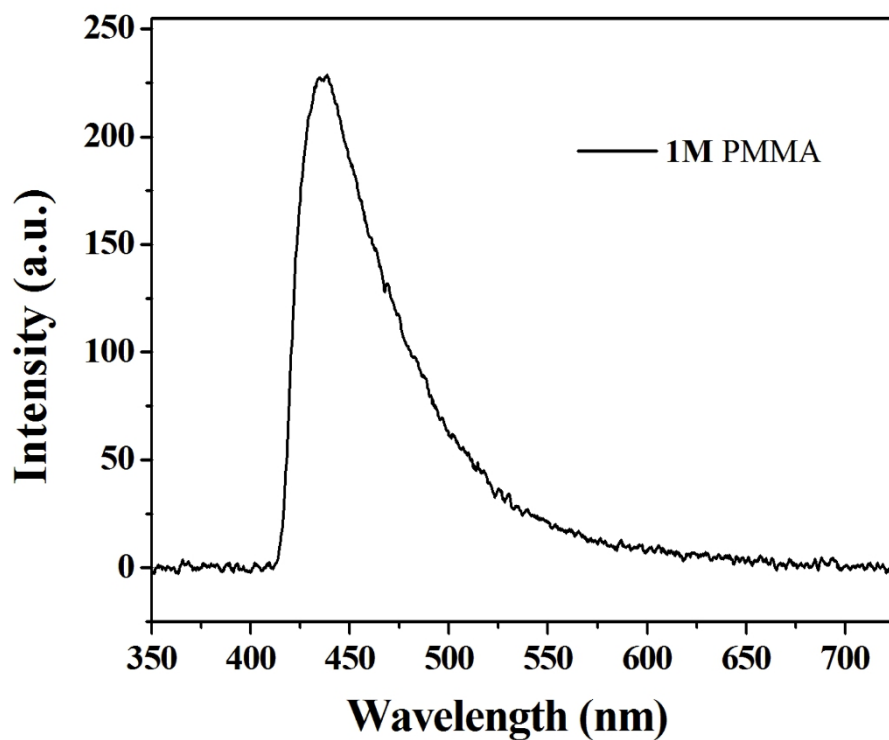

Fig. S19 PL spectrum ( $\lambda_{\text{ex}} = 365$  nm) of 1M of 3% wt. in polymethylmethacrylate (PMMA).

#### 4. Characterization of cocrystals

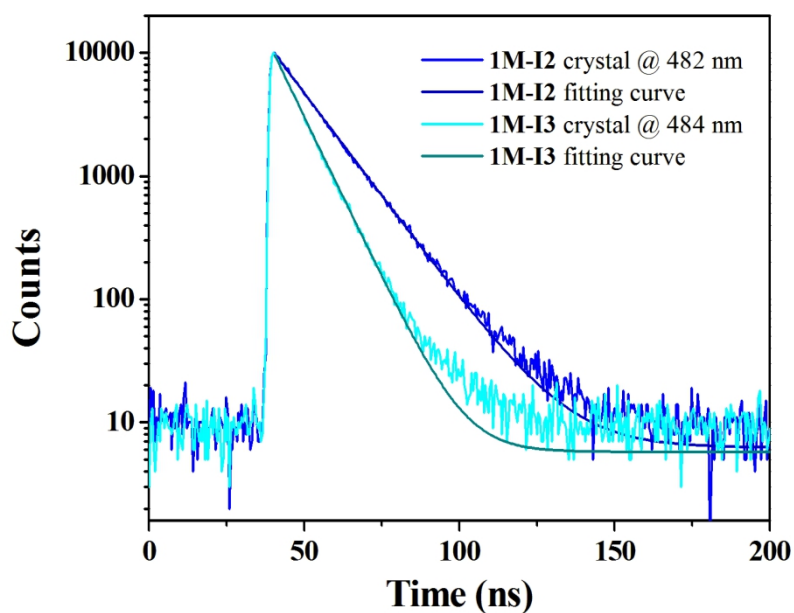

Fig. S20 The lifetimes of 1M-I2 and 1M-I3 in the crystal states ( $\lambda_{\text{ex}} = 365 \text{ nm}$ ).

**Table S3** The photophysical properties of cocrystals 1M-I2 and 1M-I3

| Compound     | PL (nm) | $\tau$ (ns) | PLQY | $k_r$ ( $\text{s}^{-1}$ ) <sup>a</sup> | $k_{\text{nr}}$ ( $\text{s}^{-1}$ ) <sup>b</sup> |
|--------------|---------|-------------|------|----------------------------------------|--------------------------------------------------|
| <b>1M-I2</b> | 482     | 12.98       | 0.55 | $4.230 \times 10^7$                    | $3.475 \times 10^7$                              |
| <b>1M-I3</b> | 484     | 8.29        | 0.41 | $4.989 \times 10^7$                    | $7.079 \times 10^7$                              |

<sup>a</sup>Radiative transition rate constant:  $k_r = \Phi_F / \langle \tau \rangle$ .

<sup>b</sup>Non-radiative transition rate constant:  $k_{\text{nr}} = (1 - \Phi_F) / \langle \tau \rangle$ .  $\langle \tau \rangle = (A_1 \tau_1^2 + A_2 \tau_2^2) / (A_1 \tau_1 + A_2 \tau_2)$ .

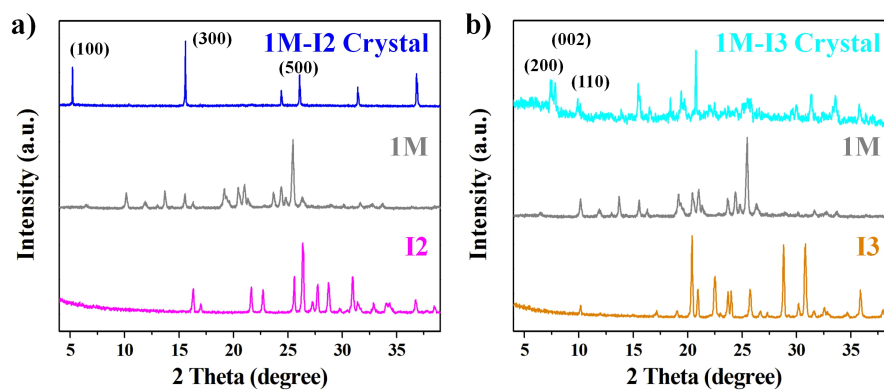

Fig. S21 XRD patterns of the cocrystals (a) 1M-I2, (b) 1M-I3 and their components.



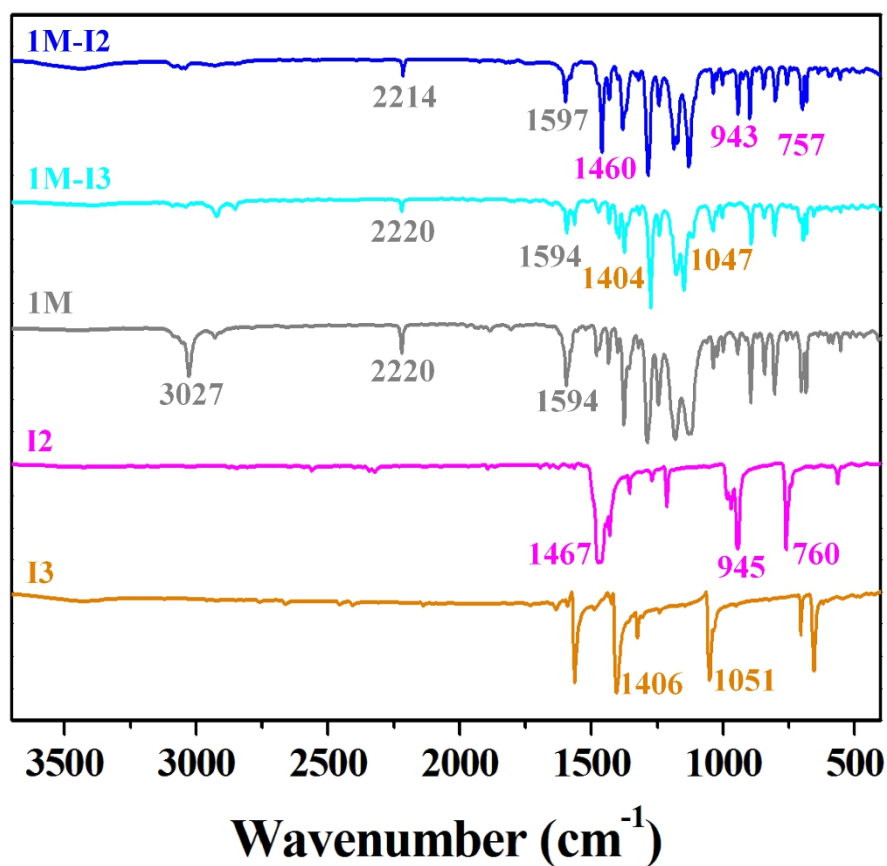

Fig. S22 FT-IR spectra of molecules I2, I3, 1M, 1M-I2 and 1M-I3.

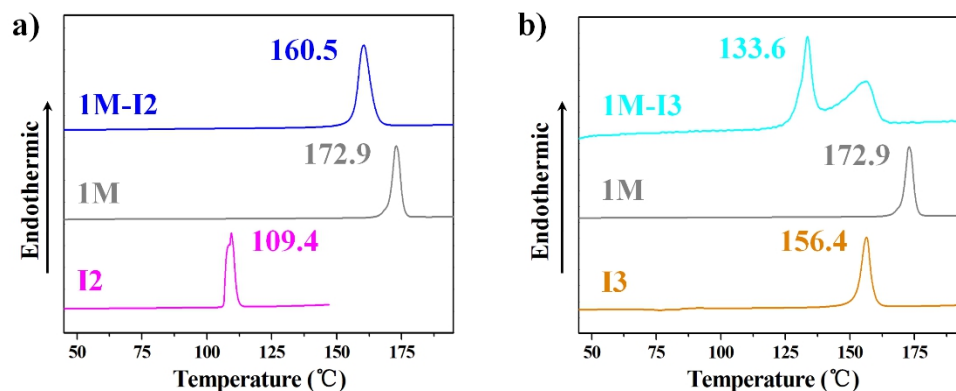

Fig. S23 Thermal analysis of the complexes (a) 1M-I2, (b) 1M-I3 and their components ( $20\text{ °C min}^{-1}$  on the second heating cycle).

**Table S4** Crystal data and structure refinements for 1M-I2 and 1M-I3

| Compound                                                     | 1M-I2                                                                         | 1M-I3                                                                         |
|--------------------------------------------------------------|-------------------------------------------------------------------------------|-------------------------------------------------------------------------------|
| Empirical formula                                            | C <sub>50</sub> H <sub>24</sub> F <sub>16</sub> I <sub>2</sub> N <sub>4</sub> | C <sub>50</sub> H <sub>24</sub> F <sub>15</sub> I <sub>3</sub> N <sub>4</sub> |
| Formula weight/g mol <sup>-1</sup>                           | 1238.53                                                                       | 1346.43                                                                       |
| <i>T</i> /K                                                  | 293(2)                                                                        | 293(2)                                                                        |
| $\lambda$ /Å                                                 | 0.71073                                                                       | 0.71073                                                                       |
| Crystal system                                               | Monoclinic                                                                    | Monoclinic                                                                    |
| Space group                                                  | <i>P</i> 2 <sub>1</sub> / <i>c</i>                                            | <i>C</i> 2/ <i>c</i>                                                          |
| Unit cell dimensions/Å                                       | <i>a</i> = 17.0950(5)<br><i>b</i> = 14.8620(4)<br><i>c</i> = 9.2252(3)        | <i>a</i> = 24.2597(17)<br><i>b</i> = 9.1991(5)<br><i>c</i> = 23.5097(13)      |
| Unit cell angles/°                                           | $\alpha$ = 90<br>$\beta$ = 91.4590(10)<br>$\gamma$ = 90                       | $\alpha$ = 90<br>$\beta$ = 103.794(4)<br>$\gamma$ = 90                        |
| Volume/Å <sup>3</sup>                                        | 2343.05(12)                                                                   | 5095.3(5)                                                                     |
| <i>Z</i>                                                     | 2                                                                             | 4                                                                             |
| $\rho$ (calculated)/Mg m <sup>-3</sup>                       | 1.756                                                                         | 1.755                                                                         |
| Absorption coefficient/mm <sup>-1</sup>                      | 1.447                                                                         | 1.934                                                                         |
| <i>F</i> (000)                                               | 1204                                                                          | 2584                                                                          |
| Crystal size/mm <sup>3</sup>                                 | 0.130 × 0.120 × 0.100                                                         | 0.130 × 0.120 × 0.100                                                         |
| $\theta$ range for data collection/°                         | 2.750 to 28.275                                                               | 2.765 to 27.477                                                               |
| Index ranges                                                 | -22 ≤ <i>h</i> ≤ 22,<br>-19 ≤ <i>k</i> ≤ 19,<br>-12 ≤ <i>l</i> ≤ 11           | -31 ≤ <i>h</i> ≤ 31,<br>-11 ≤ <i>k</i> ≤ 11,<br>-30 ≤ <i>l</i> ≤ 30           |
| Reflections collected                                        | 27896                                                                         | 52240                                                                         |
| Independent reflections                                      | 5804 [ <i>R</i> (int) = 0.0230]                                               | 5814 [ <i>R</i> (int) = 0.0404]                                               |
| Completeness to $\theta$ = 27.48                             | 99.8 %                                                                        | 99.8 %                                                                        |
| Absorption correction                                        | Semi-empirical from equivalents                                               | Semi-empirical from equivalents                                               |
| Max. and min. transmission                                   | 0.869 and 0.834                                                               | 0.830 and 0.787                                                               |
| Refinement method                                            | Full-matrix least-squares on <i>F</i> <sup>2</sup>                            | Full-matrix least-squares on <i>F</i> <sup>2</sup>                            |
| Data / restraints / parameters                               | 5804 / 0 / 433                                                                | 5814 / 12 / 381                                                               |
| Goodness-of-fit on <i>F</i> <sup>2</sup>                     | 1.025                                                                         | 1.066                                                                         |
| Final <i>R</i> indices [ <i>I</i> > 2 $\sigma$ ( <i>I</i> )] | <i>R</i> <sub>1</sub> = 0.0360, w <i>R</i> <sub>2</sub> = 0.0901              | <i>R</i> <sub>1</sub> = 0.0474, w <i>R</i> <sub>2</sub> = 0.1094              |
| <i>R</i> indices (all data)                                  | <i>R</i> <sub>1</sub> = 0.0499, w <i>R</i> <sub>2</sub> = 0.1001              | <i>R</i> <sub>1</sub> = 0.0643, w <i>R</i> <sub>2</sub> = 0.1245              |
| Large st diff. peak and hole/e Å <sup>-3</sup>               | 0.472 and -0.660                                                              | 1.509 and -1.147                                                              |
| CCDC                                                         | 1863054                                                                       | 1863055                                                                       |

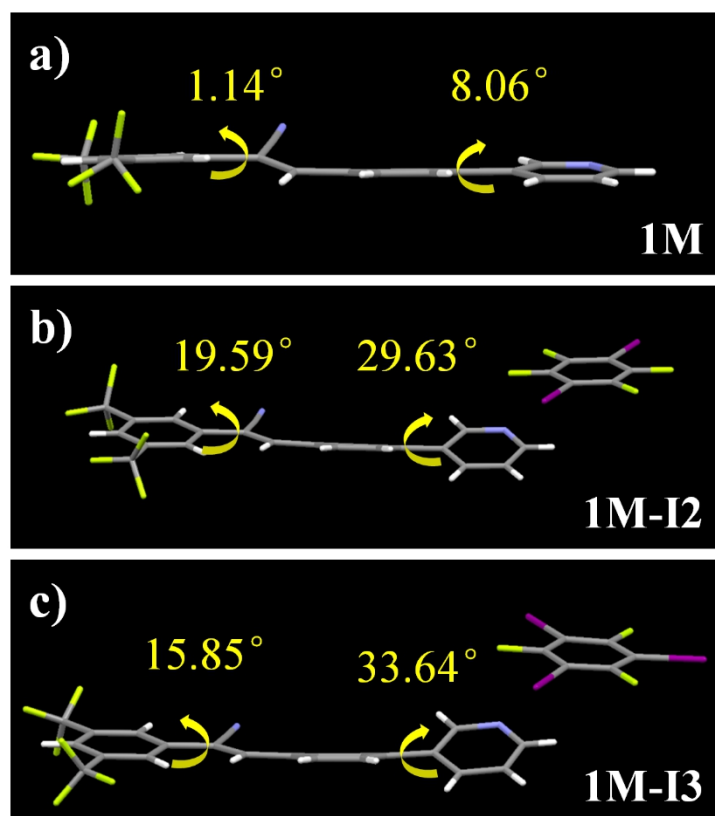

Fig. S24 Molecular configurations in the crystals of (a) 1M, (b) 1M-I2 and (c) 1M-I3.

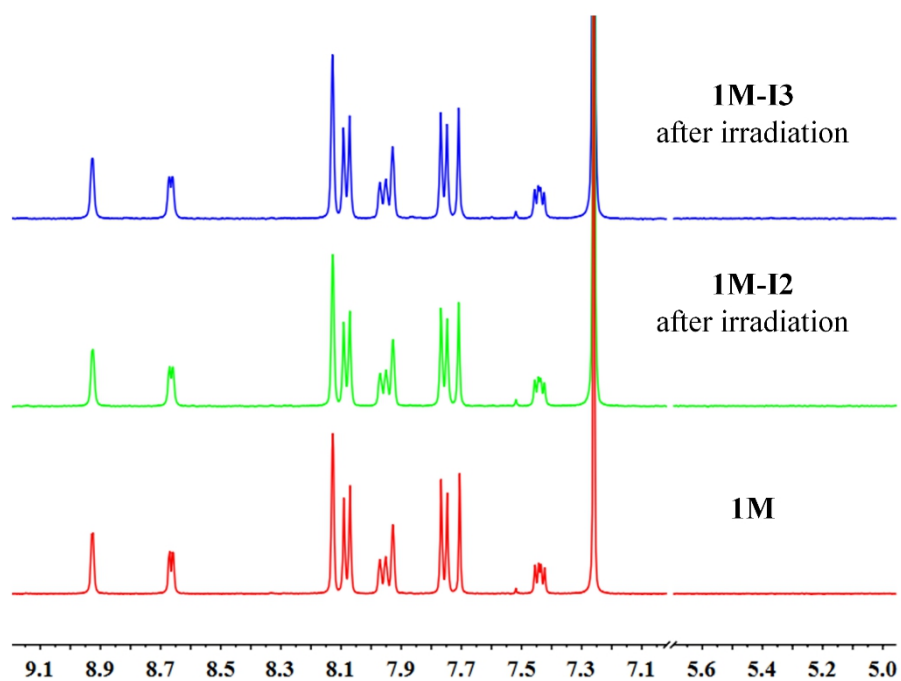

Fig. S25  $^1\text{H-NMR}$  spectra of 1M, 1M-I2 and 1M-I3 (14 mM) after irradiation.

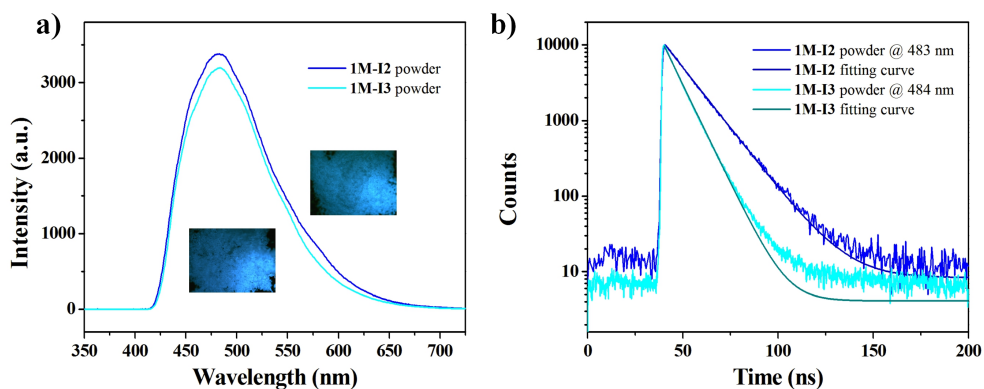

**Fig. S26** PL spectra and lifetimes of powders for (a) 1M-I2 and (b) 1M-I3. The insets show the fluorescent microphotographs of powders, respectively ( $\lambda_{\text{ex}} = 365$  nm).

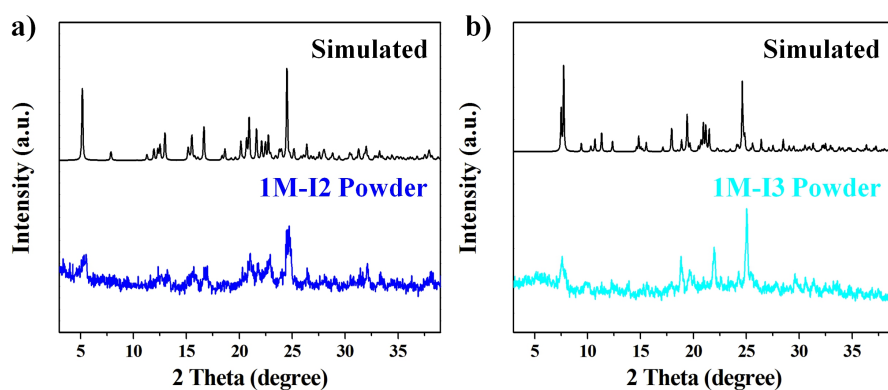

**Fig. S27** Experimental XRD patterns of (a) 1M-I2 powder and (b) 1M-I3 powder and the calculated diffraction patterns based on the single crystal data.

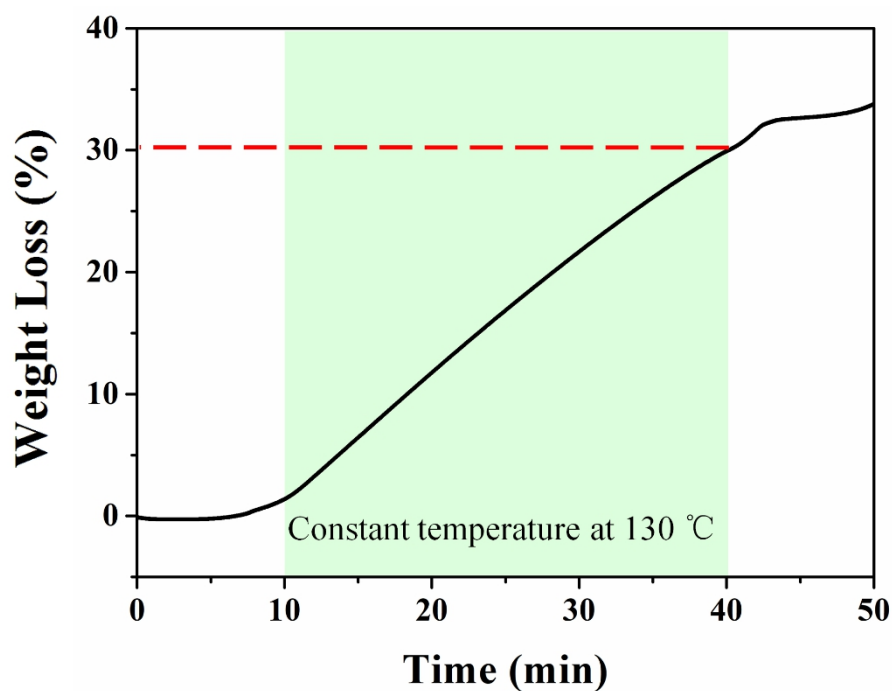

**Fig. S28** Constant temperature weight loss curve of 1M-I2.

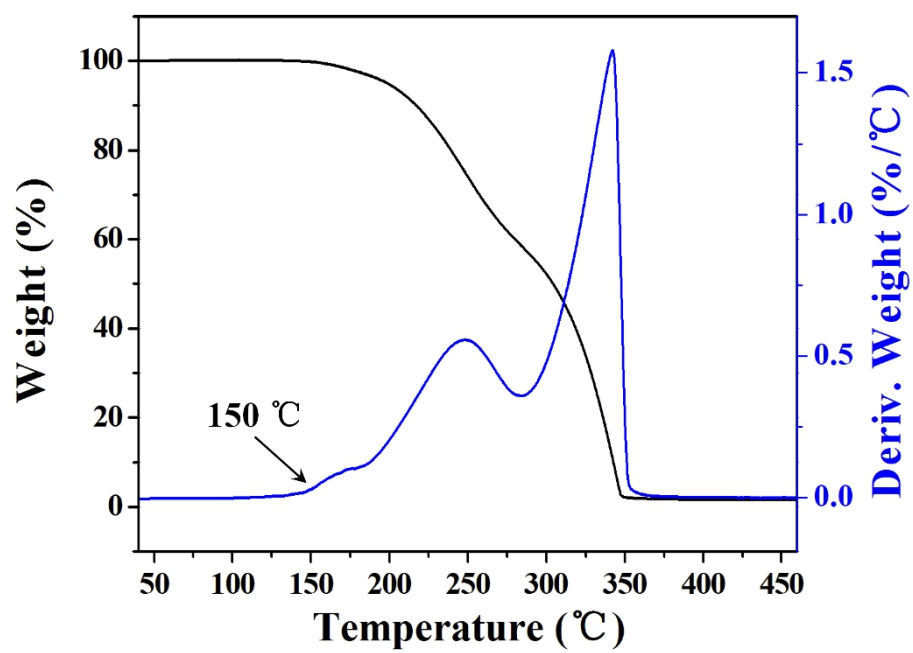

Fig. S29 TGA curve of cocrystal 1M-I3 (10 °C min<sup>-1</sup>).
